# Supplementary material
Source: PubMed Central journal article supplement (PMC9133071)
Supplement: 41598_2022_8233_MOESM1_ESM.pdf [file 41598_2022_8233_MOESM1_ESM.pdf]

## Dataset 1. Hemagglutinin genbank accession numbers used to expand the IRIS dataset

---

### A/H1N1

AB514226,AB514227,AB558344,AB558381,AB558384,CY036669,CY036670,CY036690,CY039127,CY040114,CY040162,CY040637,CY041750,CY043086,CY043187,CY043792,CY044204,CY044909,CY044965,CY045013,CY045495,CY046331,CY046499,CY047326,CY049092,CY049188,CY049451,CY049883,CY049971,CY050174,CY050368,CY050420,CY050975,CY051087,CY051215,CY051423,CY051439,CY051463,CY051759,CY052015,CY052106,CY052154,CY052927,CY053158,CY053293,CY054548,CY054707,CY054827,CY054987,CY055019,CY055214,CY055764,CY055836,CY055876,CY055916,CY056036,CY056164,CY056619,CY056651,CY056723,CY056907,CY057027,CY057294,CY057430,CY057494,CY057678,CY057766,CY057966,CY058054,CY058548,CY060726,CY061946,CY062218,CY062402,CY062415,CY062421,CY062522,CY062643,CY062843,CY062875,CY063027,CY063163,CY063171,CY063235,CY063502,CY063566,CY063763,CY063795,CY064399,CY064440,CY064446,CY064628,CY065099,CY065920,CY067023,CY068994,CY069114,CY069266,CY069290,CY069397,CY071039,CY071103,CY071602,CY071642,CY072470,CY072558,CY072758,CY073378,CY073665,CY074131,CY074403,CY074427,CY074483,CY074571,CY075909,CY080618,CY080937,CY084454,CY087024,CY089187,CY092101,CY092928,CY099330,CY111659,CY111699,CY120445,CY120923,CY122695,CY122872,CY123174,CY123253,CY123268,CY123279,CY123561,CY123667,CY123736,CY123817,CY123929,CY123934,CY124079,CY128283,CY128347,CY147787,CY147939,CY147955,CY163463,CY163472,CY163474,CY163475,CY163478,CY163484,CY163491,CY163496,CY163500,CY163502,CY187193,CY187197,CY187204,CY187205,CY187221,CY187224,CY187227,CY187230,CY187234,CY187236,CY187240,CY187247,CY187248,CY187258,CY187261,CY187262,CY187269,CY187280,CY187293,CY187295,CY187296,CY187309,CY187311,CY187314,CY187328,CY187331,CY187338,CY187341,CY187350,CY187352,CY187360,CY187377,CY187636,CY187652,CY187655,CY187659,CY187670,CY187683,CY187707,CY187717,CY187725,CY188289,CY188313,CY188393,CY188537,CY188569,CY188889,CY188969,CY189033,CY189073,CY189169,CY189177,CY189209,CY189217,CY189297,CY189449,CY189529,CY189559,CY189735,EU516300,EU566976,EU779617,FJ686969,FJ984401,FJ998209,GQ162190,GQ162194,GQ168861,GQ221791,GQ225365,GQ232049,GQ323574,GQ329082,GQ338358,GQ338361,GQ359765,GQ377061,GQ377085,GQ466386,GQ475927,GQ527165,GQ894905,GQ896375,HM014332,HM144117,HM214478,HM230693,HM567816,HM780470,HQ228029,HQ228040,HQ228080,HQ228128,HQ291889,JN171945,JN256831,JN256842,JN256844,JN389446,JN412821,JN631054,JQ065113,JQ065149,JQ065150,JQ065169,JQ065208,JQ431208,JQ714172,JQ714175,JQ714177,KC780182,KC780246,KC780480,KC780489,KC780516,KC780981,KC781018,KC781042,KC781096,KC781103,KC781519,KC781905,KC781917,KC782046,KC782215,KF647985,KF648020,KF648032,KF648129,KF667891,KF667911,KF667919,KJ196070,KJ395995,KJ395999,KJ396002,KJ396010,KJ396012,KJ396014,KJ396024,KJ396028,KJ396031,KJ396032,KJ396036,KJ406387,KJ538498,KJ549778,KJ635894,KJ635902,KJ645781,KJ645784,KJ889280,KM186099,KM213259,KM219135,KM219159,KM219191,KM219279,KM366375,KM366455,KM366679,KM366759,KM408913,KM408982,KM409000,KM409009,KM409048,KM409069,KM409074,KM409077,KM409095,KM409101,KM409128,KM409134,KM409163,KM409190,KM409193,KM409226,KM409229,KM409241,KM409244,KM409262,KM409268,KM409271,KM409292,KM409319,KM409331,KM409367,KM409370,KM409385,KM437634,KM437642,KM437650,KM437834, KP019892, KP019901, KP019903, KP019911, KP019917, KP019923, KP019930, KP864371, KP864374, KP864375, KP864384, KP864394, KP864406, KP864411, KP864412, KP941705, KP941707, KP941712, KP941719, KP941720, KP941721, KP941724, KP941726, KP941727, KP941733, KP941737, KR271551, KR271583, KR271591, KR271599, KR611204, KR611211, KR611225, KR611229, KR611234, KR611235, KR611238, KT181075, KT181095, KT181100, KT181121, KT181135, KT181176, KT274236, KT274237, KT274240, KT274243, KT274282, KT274288, KT274296, KT274302, KT274312, KT274322, KT274326, KT274355, KT274363, KT274364, KT274374, KT274393, KT274409, KT274425, KT274449, KT274469, KT274474, KT274486, KT274493, KT274505, KT274513, KT274520, KT274522, KT274534, KT274553, KT274572, KT274583, KT274588, KT274606, KT274607, KT274608, KT274631, KT274640, KT274661, KT836462, KT836729, KT836731, KT836732, KT880114, KT880115, KT880131, KU051431, LC032825, LC032833, LC033097, LC033273, LC033281

### A/H3N2

CY035054,CY036927,CY036951,CY036967,CY037311,CY037319,CY037519,CY037543,CY037575,CY

037591,CY037615,CY037631,CY037831,CY037863,CY037871,CY038815,CY038823,CY038847,CY038863,CY039431,CY041466,CY044429,CY044612,CY044620,CY044668,CY044748,CY044780,CY044812,CY044844,CY044852,CY050093,CY050108,CY050110,CY050127,CY050136,CY050452,CY050492,CY050540,CY050580,CY050620,CY050628,CY050692,CY050716,CY050732,CY050788,CY050796,CY050804,CY050812,CY058788,CY058804,CY061898,CY064855,CY067213,CY067937,CY067945,CY067969,CY067985,CY067993,CY068033,CY068041,CY068057,CY068145,CY068169,CY068209,CY068241,CY068265,CY068329,CY068361,CY068393,CY068457,CY068473,CY068481,CY068497,CY068521,CY068537,CY068545,CY068593,CY068617,CY068678,CY068718,CY068742,CY068750,CY068774,CY068782,CY068814,CY068822,CY068838,CY068854,CY069357,CY069429,CY080563,CY081454,CY084334,CY087159,CY089629,CY089773,CY091853,CY091855,CY091857,CY092329,CY092377,CY093303,CY093327,CY093343,CY093351,CY100073,CY100087,CY104622,CY105830,CY105862,CY106608,CY106632,CY106648,CY106712,CY106728,CY106736,CY106744,CY106752,CY106760,CY106792,CY106872,CY106896,CY106904,CY106992,CY113021,CY115528,CY115560,CY115584,CY115592,CY115608,CY115616,CY115624,CY115688,CY115720,CY115776,CY115784,CY119034,CY147667,CY172175,CY173191,CY173223,CY173263,CY173511,CY173519,CY173527,CY173559,CY187382,CY187645,CY187953,CY188089,CY188225,CY188249,CY188497,CY188545,CY189639,CY189655,CY189695,CY189823,CY193262,CY193264,CY193266,CY193270,CY193275,CY193281,CY193282,CY193297,CY193300,CY193307,CY193311,CY193317,CY193319,CY193320,CY193326,CY193329,CY193330,CY193363,CY193365,CY193374,CY193390,CY193408,CY193418,CY193422,CY193466,CY193469,CY193475,CY193478,CY193488,CY193496,CY193512,CY193519,CY193521,CY193529,CY193530,CY193541,CY193551,CY193556,CY193559,CY193565,CY193576,CY193580,CY193596,CY193613,CY193614,CY193619,CY193621,CY193660,CY193661,CY193690,CY193731,CY193747,CY193879,CY193950,CY193951,CY193976,CY193981,CY193982,EU716453,EU716462,EU716470,EU716471,EU779510,EU779516,EU779518,EU779520,EU779526,EU779532,EU851995,EU852001,EU852005,EU885499,EU885503,EU885512,EU885518,EU885524,EU885526,EU885528,EU885530,EU885532,EU885536,EU885538,EU914859,FJ009471,FJ009473,FJ179354,FJ179356,FJ532080,FJ686935,FJ686937,FJ686946,GQ293083,GQ369906,GQ369928,GQ385818,GQ385869,GQ385872,GQ385874,GQ385887,GQ385889,GQ385897,GQ385900,GQ385915,GQ895010,GQ895019,GQ895050,GQ902793,GQ902817,GQ902825,JN256696,JN256698,JN256700,JN256707,JN256709,JN256712,JN256722,JN256724,JN256725,JN256729,JN256741,JX437710,JX437829,KC535327,KC535342,KC535352,KC535369,KC535378,KC535381,KC535402,KC535417,KF014160,KF014197,KF014202,KF014230,KF014232,KF789774,KF789858,KF790136,KF790155,KF790297,KJ196077,KJ439217,KJ561706,KJ609206,KJ667973,KJ734749,KJ938665,KJ938671,KM061041,KM063935,KM063949,KM063954,KM063985,KM063992,KM064041,KM064092,KM064105,KM064114,KM064125,KM064140,KM064169,KM064187,KM064200,KM064201,KM064239,KM064254,KM064261,KM064272,KM064290,KM064315,KM064354,KM064362,KM064373,KM064376,KM064390,KM064413,KM064470,KM064501,KM064521,KM069488,KM069492,KM069494,KM069495,KM069497,KM069585,KM069595,KM069596,KM069600,KM069601,KM507567,KM852887,KM852927,KM852974,KM852976,KM853006,KM853009,KP701625,KP701631,KP701634,KP701636,KP701651,KP701657,KP701661,KP701669,KP701721,KP701727,KP877349,KP877360,KR057515,KR057558,KR057592,KR057637,KR057664,KR534277,KR534278,KR534279,KR534280,KR534281,KR534282,KR534283,KR534284,KR534285,KR534286,KR534287,KR534288,KR534289,KR534290,KR534291,KR534292,KR534293,KR534294,KR534295,KR534296,KR534297,KR534298,KR534299,KR534300,KR534301,KR534302,KR534303,KR534304,KR534305,KR534306,KR534307,KR534308,KR534309,KR534310,KR534311,KR534312,KR534313,KR534314,KR534315,KR534316,KR534317,KR534318,KR534319,KR534320,KR534321,KR534322,KR534323,KR534324,KR534325,KR534326,KR534327,KR534328,KR534329,KR534330,KR534331,KR534332,KR534333,KR534334,KR534335,KR534336,KR534337,KR534338,KR534339,KR534340,KR534341,KR534342,KR534343,KR534344,KR534345,KR534346,KR534347,KR534348,KR534349,KR534350,KR534351,KR534352,KR534353,KR534354,KR534355,KR534356,KR534357,KR534358,KR534359,KR534360,KR534361,KR534362,KR534363,KR534364,KR534365,KR534366,KR534367,KR534368,KR534369,KR534370,KR534371,KR534372,KR534373,KR534374,KR534375,KR534376,KR534377,KR534378,KR534379,KR534380,KR534381,KR534382,KR534383,KR534384,KR534385,KR534386,KR534387,KR534388,KR534389,KR534390,KR534391,KR534392,KR534393,KR534394,KR534395,KR534396,KR534397,KR534398,KR534399,KR534400,KR534401,KR534402,KR534403,KR534404,KR534405,KR534406,KR534407,KR534408,KR534409,KR534410,KR534411,KR534412,KR534413,KR534414,KR534415,KR534416,KR534417,KR534418,KR534419,KR534420,KR534421,KR534422,KR534423,KR534424,KR534425,KR534426,KR534427,KR534428,KR534429,KR534430,KR534431,KR534432,KR534433,KR534434,KR534435,KR534436,KR534437,KR534438,KR534439,KR534440,KR534441,KR534442,KR534443,KR534444,KR534445,KR534446,KR534447,KR534448,KR534449,KR534450,KR534451,KR534452,KR534453,KR534454,KR534455,KR534456,KR534457,KR534458,KR534459,KR534460,KR534461,KR534462,KR534463,KR534464,KR534465,KR534466,KR534467,KR534468,KR534469,KR534470,KR534471,KR534472,KR534473,KR534474,KR534475,KR534476,KR534477,KR534478,KR534479,KR534480,KR534481,KR534482,KR534483,KR534484,KR534485,KR534486,KR534487,KR534488,KR534489,KR534490,KR534491,KR534492,KR534493,KR534494,KR534495,KR534496,KR534497,KR534498,KR534499,KR534500,KR534501,KR534502,KR534503,KR534504,KR534505,KR534506,KR534507,KR534508,KR534509,KR534510,KR534511,KR534512,KR534513,KR534514,KR534515,KR534516,KR534517,KR534518,KR534519,KR534520,KR534521,KR534522,KR534523,KR534524,KR534525,KR534526,KR534527,KR534528,KR534529,KR534530,KR534531,KR534532,KR534533,KR534534,KR534535,KR534536,KR534537,KR534538,KR534539,KR534540,KR534541,KR534542,KR534543,KR534544,KR534545,KR534546,KR534547,KR534548,KR534549,KR534550,KR534551,KR534552,KR534553,KR534554,KR534555,KR534556,KR534557,KR534558,KR534559,KR534560,KR534561,KR534562,KR534563,KR534564,KR534565,KR534566,KR534567,KR534568,KR534569,KR534570,KR534571,KR534572,KR534573,KR534574,KR534575,KR534576,KR534577,KR534578,KR534579,KR534580,KR534581,KR534582,KR534583,KR534584,KR534585,KR534586,KR534587,KR534588,KR534589,KR534590,KR534591,KR534592,KR534593,KR534594,KR534595,KR534596,KR534597,KR534598,KR534599,KR534600,KR534601,KR534602,KR534603,KR534604,KR534605,KR534606,KR534607,KR534608,KR534609,KR534610,KR534611,KR534612,KR534613,KR534614,KR534615,KR534616,KR534617,KR534618,KR534619,KR534620,KR534621,KR534622,KR534623,KR534624,KR534625,KR534626,KR534627,KR534628,KR534629,KR534630,KR534631,KR534632,KR534633,KR534634,KR534635,KR534636,KR534637,KR534638,KR534639,KR534640,KR534641,KR534642,KR534643,KR534644,KR534645,KR534646,KR534647,KR534648,KR534649,KR534650,KR534651,KR534652,KR534653,KR534654,KR534655,KR534656,KR534657,KR534658,KR534659,KR534660,KR534661,KR534662,KR534663,KR534664,KR534665,KR534666,KR534667,KR534668,KR534669,KR534670,KR534671,KR534672,KR534673,KR534674,KR534675,KR534676,KR534677,KR534678,KR534679,KR534680,KR534681,KR534682,KR534683,KR534684,KR534685,KR534686,KR534687,KR534688,KR534689,KR534690,KR534691,KR534692,KR534693,KR534694,KR534695,KR534696,KR534697,KR534698,KR534699,KR534700,KR534701,KR534702,KR534703,KR534704,KR534705,KR534706,KR534707,KR534708,KR534709,KR534710,KR534711,KR534712,KR534713,KR534714,KR534715,KR534716,KR534717,KR534718,KR534719,KR534720,KR534721,KR534722,KR534723,KR534724,KR534725,KR534726,KR534727,KR534728,KR534729,KR534730,KR534731,KR534732,KR534733,KR534734,KR534735,KR534736,KR534737,KR534738,KR534739,KR534740,KR534741,KR534742,KR534743,KR534744,KR534745,KR534746,KR534747,KR534748,KR534749,KR534750,KR534751,KR534752,KR534753,KR534754,KR534755,KR534756,KR534757,KR534758,KR534759,KR534760,KR534761,KR534762,KR534763,KR534764,KR534765,KR534766,KR534767,KR534768,KR534769,KR534770,KR534771,KR534772,KR534773,KR534774,KR534775,KR534776,KR534777,KR534778,KR534779,KR534780,KR534781,KR534782,KR534783,KR534784,KR534785,KR534786,KR534787,KR534788,KR534789,KR534790,KR534791,KR534792,KR534793,KR534794,KR534795,KR534796,KR534797,KR534798,KR534799,KR534800,KR534801,KR534802,KR534803,KR534804,KR534805,KR534806,KR534807,KR534808,KR534809,KR534810,KR534811,KR534812,KR534813,KR534814,KR534815,KR534816,KR534817,KR534818,KR534819,KR534820,KR534821,KR534822,KR534823,KR534824,KR534825,KR534826,KR534827,KR534828,KR534829,KR534830,KR534831,KR534832,KR534833,KR534834,KR534835,KR534836,KR534837,KR534838,KR534839,KR534840,KR534841,KR534842,KR534843,KR534844,KR534845,KR534846,KR534847,KR534848,KR534849,KR534850,KR534851,KR534852,KR534853,KR534854,KR534855,KR534856,KR534857,KR534858,KR534859,KR534860,KR534861,KR534862,KR534863,KR534864,KR534865,KR534866,KR534867,KR534868,KR534869,KR534870,KR534871,KR534872,KR534873,KR534874,KR534875,KR534876,KR534877,KR534878,KR534879,KR534880,KR534881,KR534882,KR534883,KR534884,KR534885,KR534886,KR534887,KR534888,KR534889,KR534890,KR534891,KR534892,KR534893,KR534894,KR534895,KR534896,KR534897,KR534898,KR534899,KR534900,KR534901,KR534902,KR534903,KR534904,KR534905,KR534906,KR534907,KR534908,KR534909,KR534910,KR534911,KR534912,KR534913,KR534914,KR534915,KR534916,KR534917,KR534918,KR534919,KR534920,KR534921,KR534922,KR534923,KR534924,KR534925,KR534926,KR534927,KR534928,KR534929,KR534930,KR534931,KR534932,KR534933,KR534934,KR534935,KR534936,KR534937,KR534938,KR534939,KR534940,KR534941,KR534942,KR534943,KR534944,KR534945,KR534946,KR534947,KR534948,KR534949,KR534950,KR534951,KR534952,KR534953,KR534954,KR534955,KR534956,KR534957,KR534958,KR534959,KR534960,KR534961,KR534962,KR534963,KR534964,KR534965,KR534966,KR534967,KR534968,KR534969,KR534970,KR534971,KR534972,KR534973,KR534974,KR534975,KR534976,KR534977,KR534978,KR534979,KR534980,KR534981,KR534982,KR534983,KR534984,KR534985,KR534986,KR534987,KR534988,KR534989,KR534990,KR534991,KR534992,KR534993,KR534994,KR534995,KR534996,KR534997,KR534998,KR534999,LC033145,LC033329

---
